# Supplementary material for: Tidally disrupted dusty clumps as the origin of broad emission lines in active galactic nuclei
Source: Springer Nature journal article supplement (doi:10.1038/s41550-017-0264-4), 2017-10-05
Supplement: 41550_2017_264_MOESM1_ESM.pdf [file 41550_2017_264_MOESM1_ESM.pdf]

In the format provided by the authors and unedited.

# Tidally disrupted dusty clumps as the origin of broad emission lines in active galactic nuclei

Jian-Min Wang<sup>1,2,3\*</sup>, Pu Du<sup>1</sup>, Michael S. Brotherton<sup>4</sup>, Chen Hu<sup>1</sup>, Yu-Yang Songsheng<sup>1</sup>, Yan-Rong Li<sup>1</sup>, Yong Shi<sup>5</sup> and Zhi-Xiang Zhang<sup>1</sup>

---

<sup>1</sup>Key Laboratory for Particle Astrophysics, Institute of High Energy Physics, Chinese Academy of Sciences, 19B Yuquan Road, 100049 Beijing, China.

<sup>2</sup>School of Astronomy and Space Sciences, and School of Physical Sciences, University of Chinese Academy of Sciences, 19A Yuquan Road, 100049 Beijing, China. <sup>3</sup>National Astronomical Observatories of China, Chinese Academy of Sciences, 20A Datun Road, 100020 Beijing, China. <sup>4</sup>Department of Physics and Astronomy, University of Wyoming, Laramie, WY 82071, USA. <sup>5</sup>School of Astronomy and Space Science, Nanjing University, 210093 Nanjing, China. \*e-mail: [wangjm@ihep.ac.cn](mailto:wangjm@ihep.ac.cn)

# **The broad-line region of active galactic nuclei: tidally disrupted clumps from the torus**

Jian-Min Wang, Pu Du, Michael S. Brotherton, Chen Hu, Yu-Yang Songsheng, Yan-Rong Li,  
Yong Shi and Zhi-Xiang Zhang

## Supplementary Table 1

### A list of parameters involved in the present model

| Parameter                                                                              | Physical meanings                                                                             | Valid ranges                                 | Uncertainties<br>( $\langle\langle\Delta X/X\rangle\rangle$ ) |
|----------------------------------------------------------------------------------------|-----------------------------------------------------------------------------------------------|----------------------------------------------|---------------------------------------------------------------|
| $\zeta_0$                                                                              | $R_T^0 \omega_A^0 / v_A^0$ : determines trajectories of clumps                                | $0 \sim 50$                                  | 1.6                                                           |
| $\gamma_A$                                                                             | cloud A distribution index: $N_A = N_A^0 v_A^{\gamma_A}$                                      | $0 - 4$                                      | 0.5                                                           |
| $\xi_A$                                                                                | $v_A^0 = \xi_A (\zeta_0^2 + 1)^{-1/2} v_K^0$ , $v_K^0$ is the Keplerian velocity at $R_T^0$ . | $< 1$                                        | 0.2                                                           |
| $R_0/R_g$                                                                              | the circulaized radius of type A clouds                                                       | $\sim 6.2 \times 10^3$                       | 0.3                                                           |
| $R_{in}$                                                                               | radius of type B clouds merging with accretion disks                                          | $< R_{BLR}$                                  | 0.6                                                           |
| $\gamma_B$                                                                             | cloud B distribution index: $N_B = N_B^0 v_B^{\gamma_B}$                                      | $0 - 4$                                      | 0.5                                                           |
| $f_B$                                                                                  | fraction of type B clouds                                                                     | $0 \sim 1$                                   | 0.3                                                           |
| $\xi_C$                                                                                | $v_C^0 = \xi_C v_K^0$ , $v_C^0$ is the ejection velocity of type C clouds at $R_T^0$ .        | $> 1$                                        | 0.3                                                           |
| $f_C$                                                                                  | fraction of type C clouds, properties shown by Equation (7)                                   | $0 \sim 1$                                   | 0.6                                                           |
| $i$                                                                                    | inclination angle of observers, $i = 0^\circ$ (edge-on) and $i = 90^\circ$ (face-on)          | $\gtrsim 40^\circ$                           | 0.2                                                           |
| <b>Auxiliary Parameters (the fixed values are listed by the numbers in bold fonts)</b> |                                                                                               |                                              |                                                               |
| $\Theta_{torus}$                                                                       | half angle of torus given by the $\Theta_{torus} - L_{[OIII]}$ relation                       | Ref. <sup>1</sup>                            |                                                               |
| $\alpha_A$                                                                             | cloud A velocity index: $v_A = v_A^0 (R/R_T^0)^{-\alpha_A}$                                   | <b>0.45</b> ; $\leq 0.5$                     |                                                               |
| $\alpha_C$                                                                             | cloud C velocity index: $v_C = v_C^0 (R/R_T^0)^{-\alpha_C}$                                   | <b>0.30</b> ; $\leq 0.5$                     |                                                               |
| $\beta_A$                                                                              | cloud A angular velocity index: $\omega_A = \omega_A^0 (R/R_T^0)^{-\beta_A}$                  | <b>1.8</b> ; $\geq 1.5$                      |                                                               |
| $\gamma_C$                                                                             | cloud C distribution index: $N_C = N_C^0 v_C^{\gamma_C}$                                      | <b>0</b> ; $\sim 0.5$                        |                                                               |
| $\gamma$                                                                               | vertical distribution of clumps in torus: $\propto (\cos \theta_C)^\gamma$                    | <b>1</b> ; $\sim 1$                          |                                                               |
| $\Gamma$                                                                               | $1 + \alpha_A - \beta_A$                                                                      |                                              |                                                               |
| $R_T^0/R_g$                                                                            | tidal disruption radius of clumps.                                                            | <b>10<sup>4</sup></b> ; ( $R_0, R_{torus}$ ) |                                                               |
| $R_{BLR}$                                                                              | the emissivity-averaged radius of the BLR determined by RM.                                   |                                              |                                                               |
| $\varphi_0$                                                                            | position angle of tidal event.                                                                | $\varphi_0 = \pi/2$                          |                                                               |
| $\omega_A^0$                                                                           | angular velocity of type A clouds at $R_T^0$ .                                                | absorbed by $\zeta_0$                        |                                                               |

Note: the averaged  $\langle\langle\Delta X/X\rangle\rangle$  is obtained by the statistic of individual  $\Delta X/X$  of the sample. Here  $X$  is any one of the fitting parameters in the model.

Supplementary Table 2

Resultant parameters of best-fittings of four quasars

| Parameter              | PG1354+213            | PG2251+113           | PG1351+640             | PG1700+518           |
|------------------------|-----------------------|----------------------|------------------------|----------------------|
| $\zeta_0$              | $6.1_{-6}^{+10}$      | $0.71_{-0.5}^{+1.5}$ | $0.02_{-0.02}^{+5}$    | $38_{-31}^{+13}$     |
| $\xi_A$                | $0.36_{-0.1}^{+0.3}$  | $0.59_{-0.1}^{+0.2}$ | $0.42_{-0.1}^{+0.1}$   | $0.63_{-0.1}^{+0.1}$ |
| $\gamma_A$             | $0.79_{-0.79}^{+1.4}$ | $3.6_{-1.8}^{+0.9}$  | $0.51_{-0.2}^{+0.9}$   | $1.5_{-0.5}^{+0.9}$  |
| $R_0(10^3 R_g)$        | $3.2_{-0.9}^{+1.2}$   | $2.6_{-0.7}^{+1.0}$  | $1.4_{-0.8}^{+1.5}$    | $7.5_{-2.5}^{+1.5}$  |
| $R_{in}(10^3 R_g)$     | $0.31_{-0.1}^{+0.2}$  | $0.38_{-0.1}^{+0.1}$ | $0.39_{-0.1}^{+0.1}$   | $3.6_{-0.9}^{+1.3}$  |
| $\gamma_B$             | $1.2_{-0.1}^{+0.1}$   | $2.1_{-1.0}^{+0.9}$  | $2.8_{-1.8}^{+0.9}$    | $3.0_{-1.3}^{+0.9}$  |
| $f_B$                  | $0.95_{-0.6}^{+0.1}$  | $0.78_{-0.2}^{+0.1}$ | $0.73_{-0.1}^{+0.1}$   | $0.24_{-0.1}^{+0.0}$ |
| $\xi_C$                | $2.7_{-1.1}^{+0.5}$   | $1.1_{-0.5}^{+0.2}$  | $2.2_{-0.4}^{+0.1}$    | $2.9_{-0.1}^{+0.1}$  |
| $f_C$                  | $0.02_{-0.02}^{+0.1}$ | $0.18_{-0.1}^{+0.1}$ | $0.04_{-0.01}^{+0.01}$ | $0.44_{-0.1}^{+0.1}$ |
| $i(^{\circ})$          | $75_{-13}^{+8}$       | $66_{-9}^{+9}$       | $74_{-9}^{+5}$         | $61_{-1}^{+2}$       |
| Line profiles          |                       |                      |                        |                      |
| $\mathcal{A}_{H\beta}$ | 4.85                  | 0.15                 | 12.8                   | 2.90                 |
| $\mathcal{S}_{H\beta}$ | 0.30                  | 0.22                 | 1.41                   | 1.07                 |
| $\mathcal{Z}_{H\beta}$ | 1.34                  | 1.12                 | 1.77                   | 2.15                 |

Parameters of all the PG quasars will be provided on request.

### Supplementary Table 3

#### Classifications of resultant fittings

| Model | Number | Objects (total of 87 PG quasars)                                                                                                                                                                                                                                                                                                                                                                                                                                                                                                                                                                                                                                                                                                                                             |
|-------|--------|------------------------------------------------------------------------------------------------------------------------------------------------------------------------------------------------------------------------------------------------------------------------------------------------------------------------------------------------------------------------------------------------------------------------------------------------------------------------------------------------------------------------------------------------------------------------------------------------------------------------------------------------------------------------------------------------------------------------------------------------------------------------------|
| B     | 1      | 1354+213                                                                                                                                                                                                                                                                                                                                                                                                                                                                                                                                                                                                                                                                                                                                                                     |
| B+C   | 1      | 2251+113                                                                                                                                                                                                                                                                                                                                                                                                                                                                                                                                                                                                                                                                                                                                                                     |
| A+B   | 12     | 0003+199, 0934+013, 1004+130, 1012+008, 1103-006, 1211+143, 1351+236<br>1351+640, 1512+370, 1534+580, 1617+175, 2233+134                                                                                                                                                                                                                                                                                                                                                                                                                                                                                                                                                                                                                                                     |
| A+B+C | 73     | 0003+158, 0007+106, 0026+129, 0043+039, 0049+171, 0050+124, 0052+251<br>0157+001, 0804+761, 0838+770, 0844+349, 0921+525, 0923+129, 0923+201<br>0947+396, 0953+414, 1001+054, 1011-040, 1022+519, 1048-090, 1048+342<br>1049-006, 1100+772, 1114+445, 1115+407, 1116+215, 1119+120, 1121+422<br>1126-041, 1149-110, 1151+117, 1202+281, 1216+069, 1226+023, 1229+204<br>1244+026, 1259+593, 1302-102, 1307+085, 1309+355, 1310-108, 1322+659<br>1341+258, 1352+183, 1402+261, 1404+226, 1411+442, 1415+451, 1416-129<br>1425+267, 1426+015, 1427+480, 1435-067, 1440+356, 1444+407, 1448+273<br>1501+106, 1519+226, 1535+547, 1543+489, 1545+210, 1552+085, 1612+261<br>1613+658, 1626+554, 1700+518, 1704+608, 2112+059, 2130+099, 2209+184<br>2214+139, 2304+042, 2308+098 |

**B:**  $f_{A,C} \leq 5\%$ ; **B+C:**  $f_A \leq 5\%$ ; **A+B:**  $f_C \leq 5\%$ ; **A+B+C:**  $f_{A,B,C} > 5\%$ .

If it is less than 5%, we consider that component to be negligible. There are only two profiles with B and (B+C) components, only 12 objects with (A+B), while the majority of 73 objects employ (A+B+C).

Generally, type B clouds are necessary in all objects, type A appears in 85/87 objects, and the type C in 74/87.

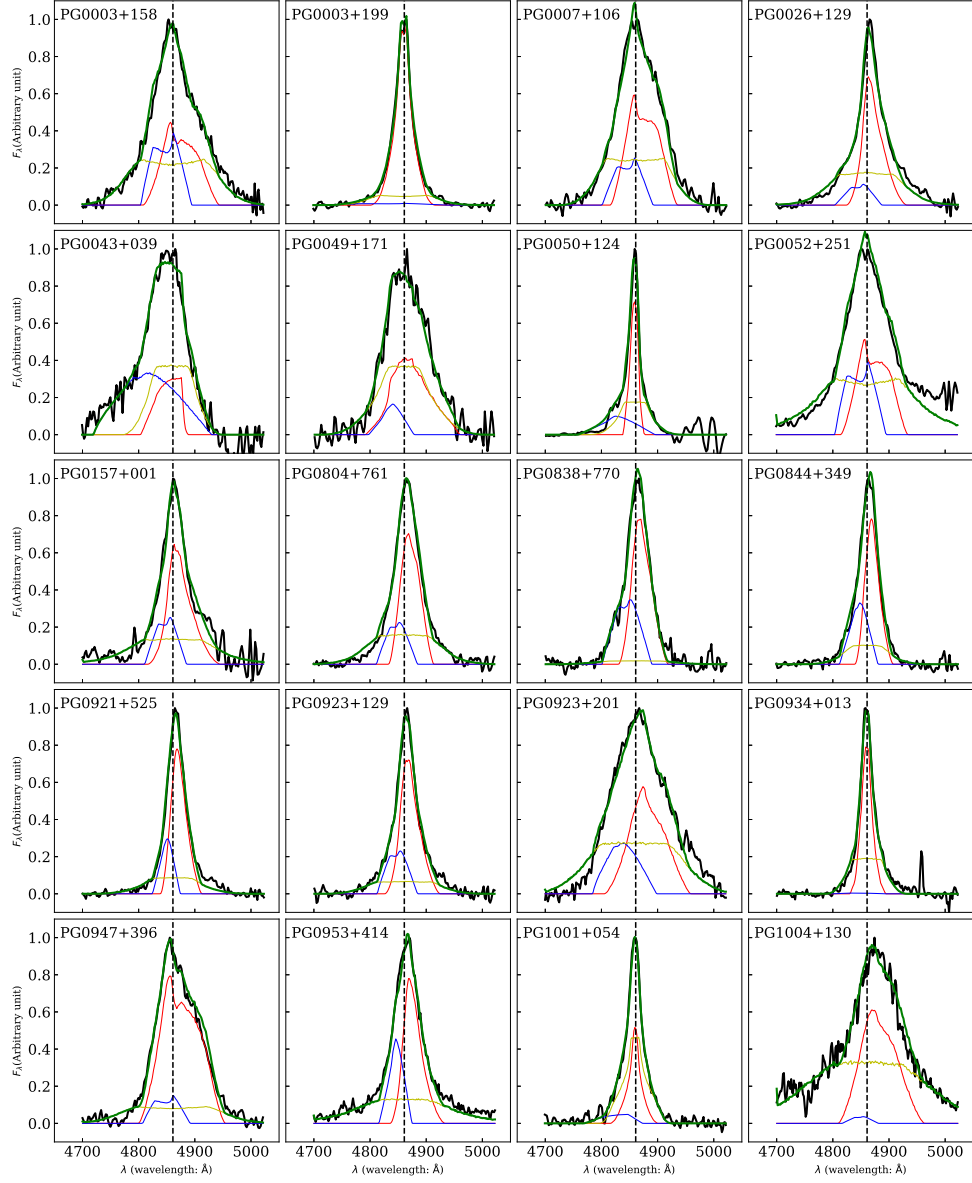

Supplementary Figure 1: Comparisons of our model fits with observed  $H\beta$  profiles of PG quasars. Solid black lines are the observed profiles, red lines are from type A clouds, the yellow from type B and the blue from type C and the green is the total of the three cloud types. The dashed lines are  $\lambda_0 = 4861 \text{ \AA}$ .

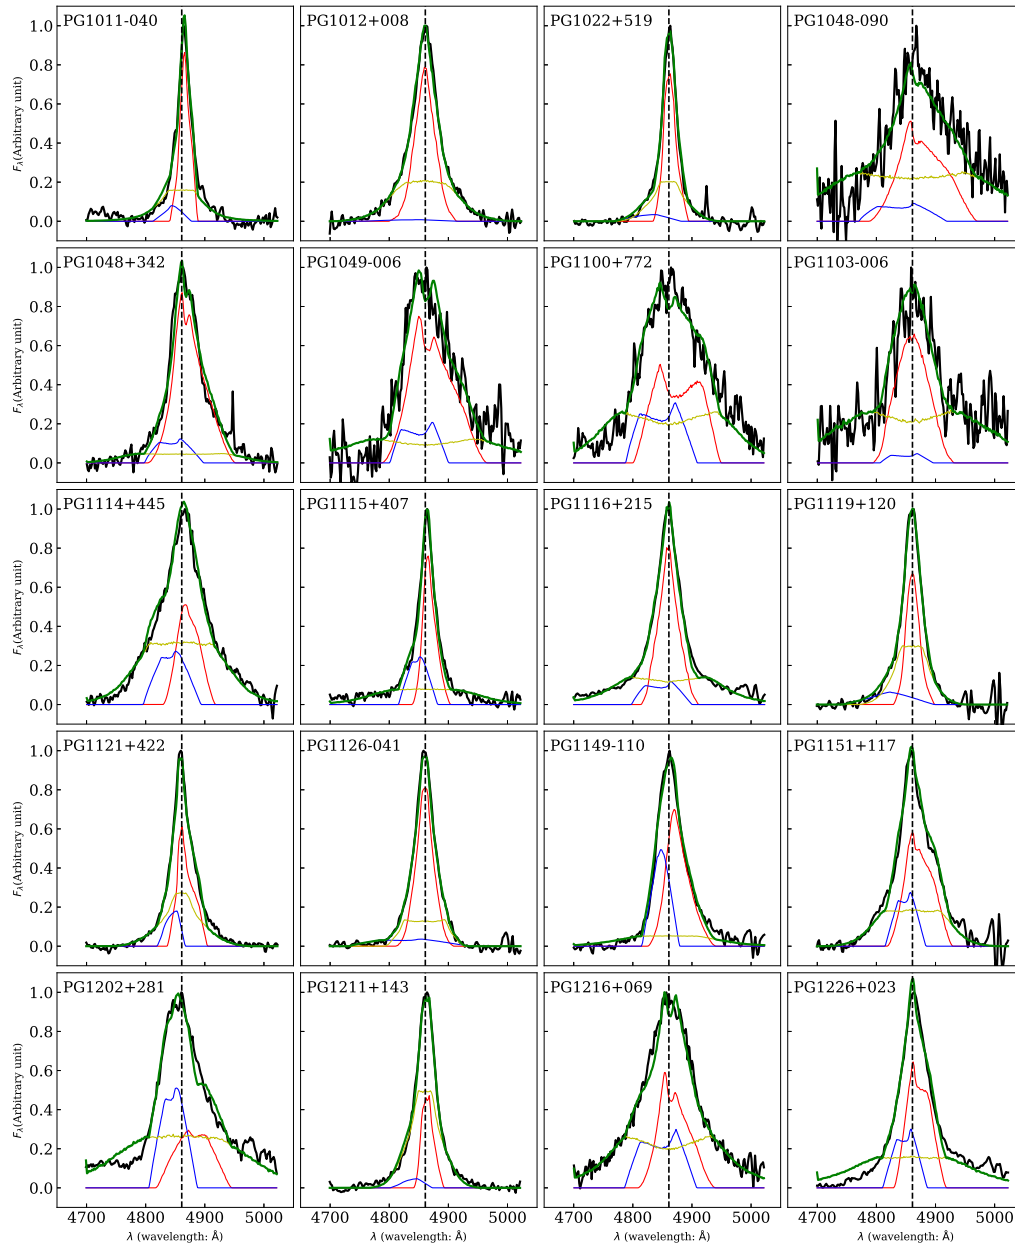

Supplementary Figure 1 *Continued.*

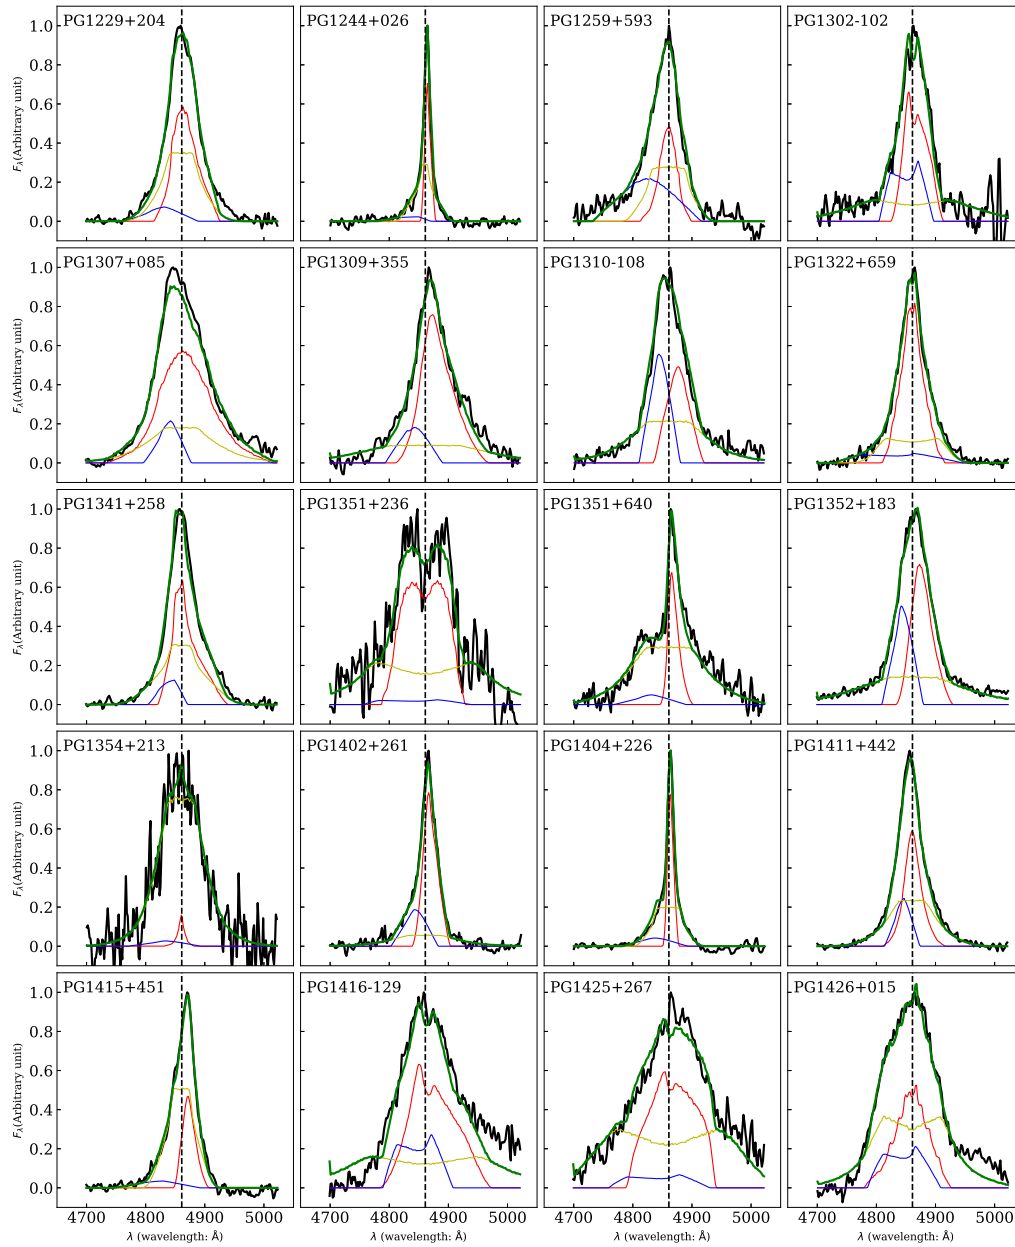

Supplementary Figure 1 *Continued*.



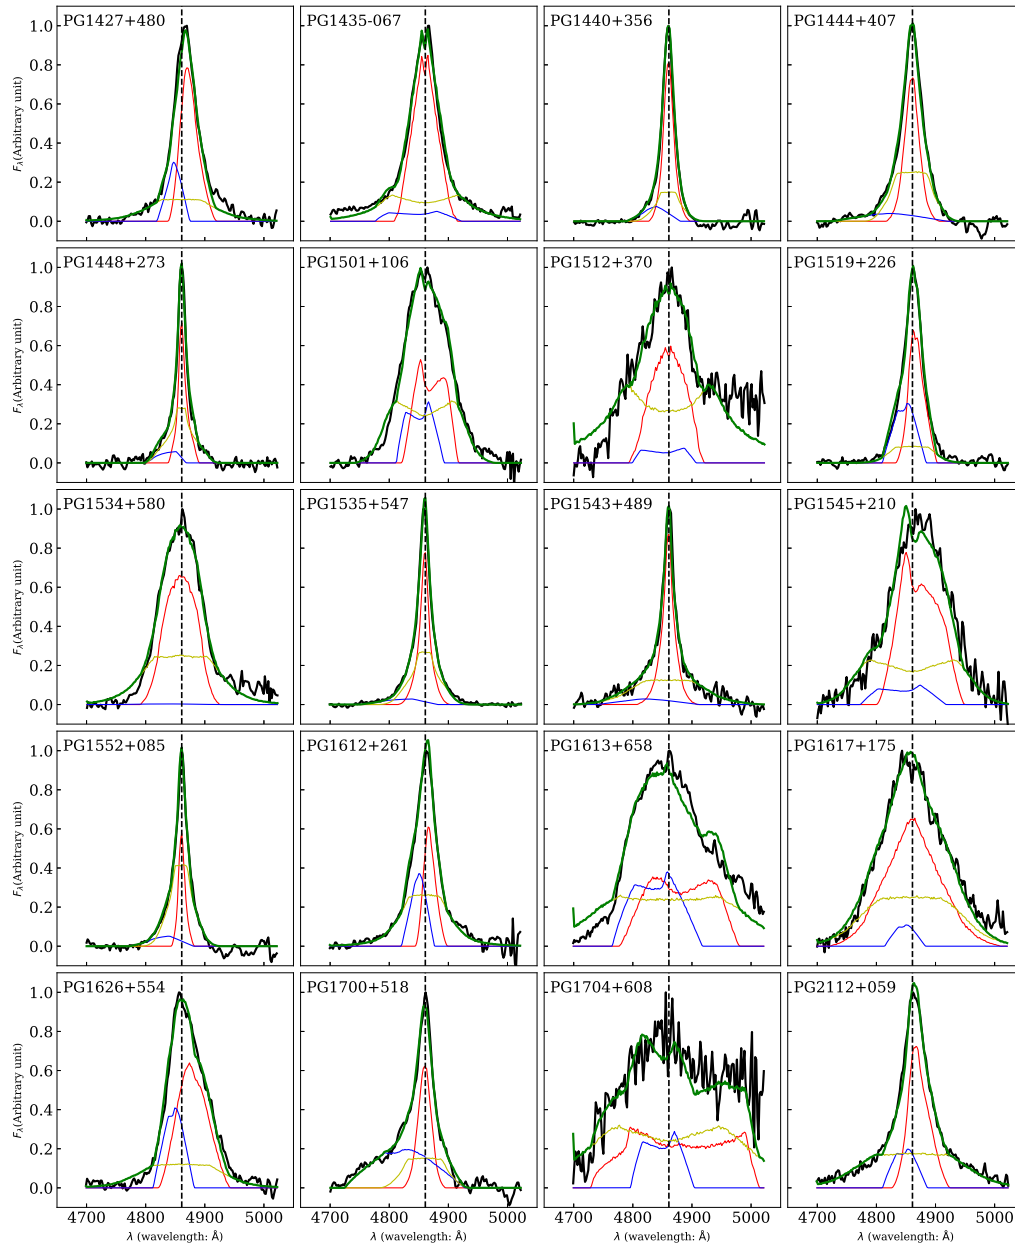

Supplementary Figure 1 *Continued.*

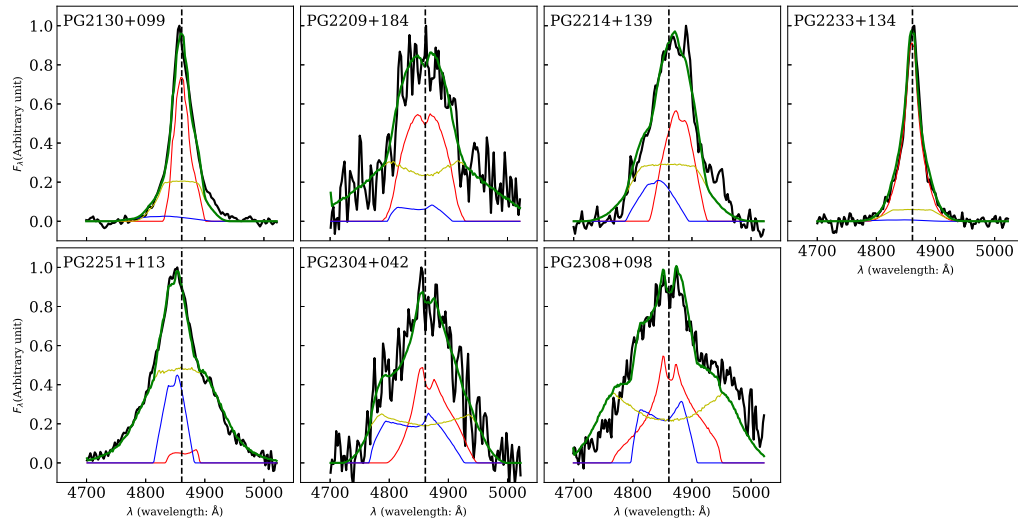

Supplementary Figure 1 *Continued.*

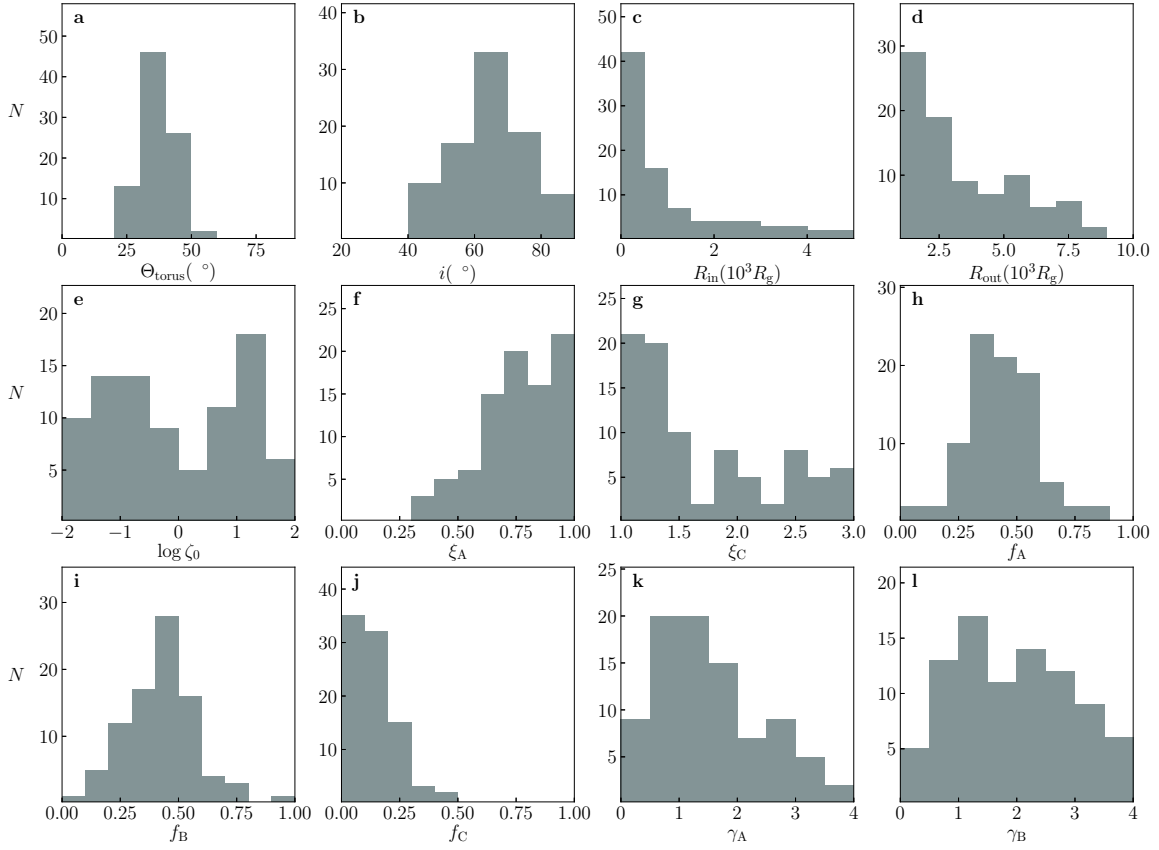

Supplementary Figure 2: **Distributions of the parameters obtained by fitting  $H\beta$  profiles.** Note  $f_C = 1 - (f_A + f_B)$ , the average fraction of type C clouds is  $\langle f_C \rangle \approx 0.1$  and  $f_C \ll (f_B, f_A)$  holds for most objects of the PG sample. There are a couple of objects with  $\xi_C \gtrsim 2$ , potentially implying acceleration of type C clouds driven by radiation pressure, but this possibility needs to be explored by numerical simulations.

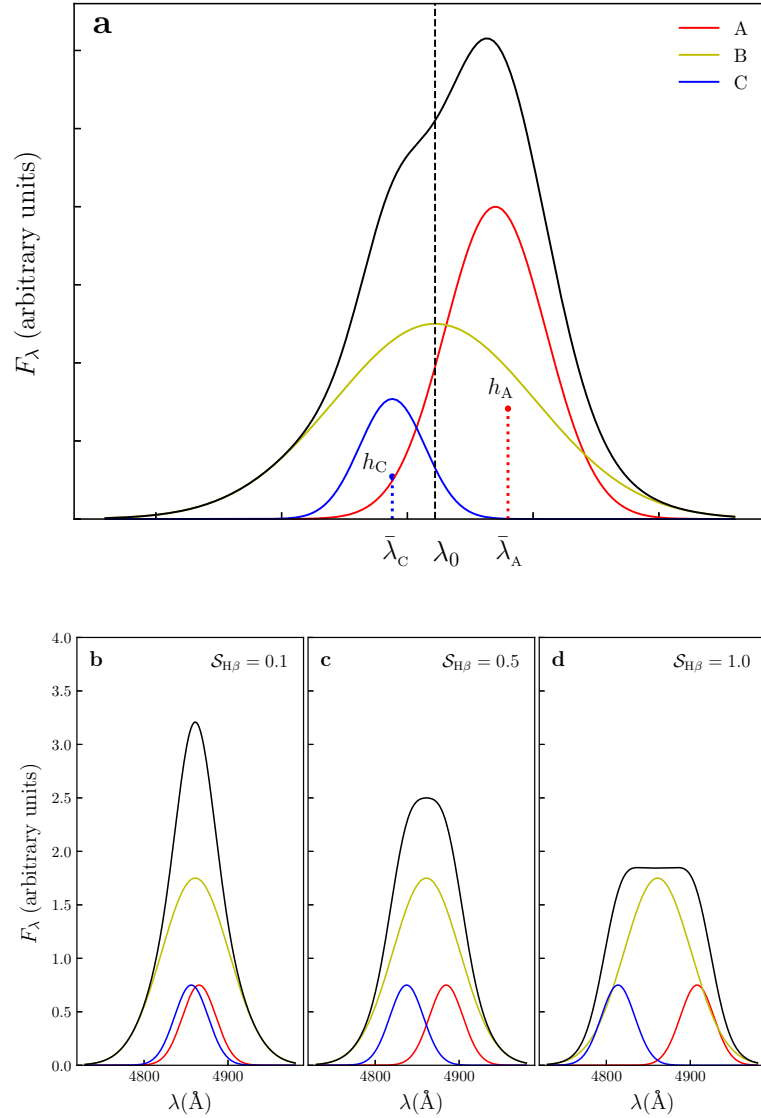

Supplementary Figure 3: **Illustration of physical meanings of parameters describing profiles.** Panel *a* shows a cartoon of decomposed profiles for physical meanings of the three parameters defined by Equation (16). The barycentre wavelength and fluxes are obtained by including flux-weight. As the first order approximation, the two parameters of  $(h, \bar{\lambda})$  can completely describe individual profiles of the decomposed components and hence provide reasonable asymmetries, shapes and shifts of the total spectra. Panels *b-d* illustrate the relationship between  $S_{H\beta}$  and real shapes of profiles (from a triangular to boxy).

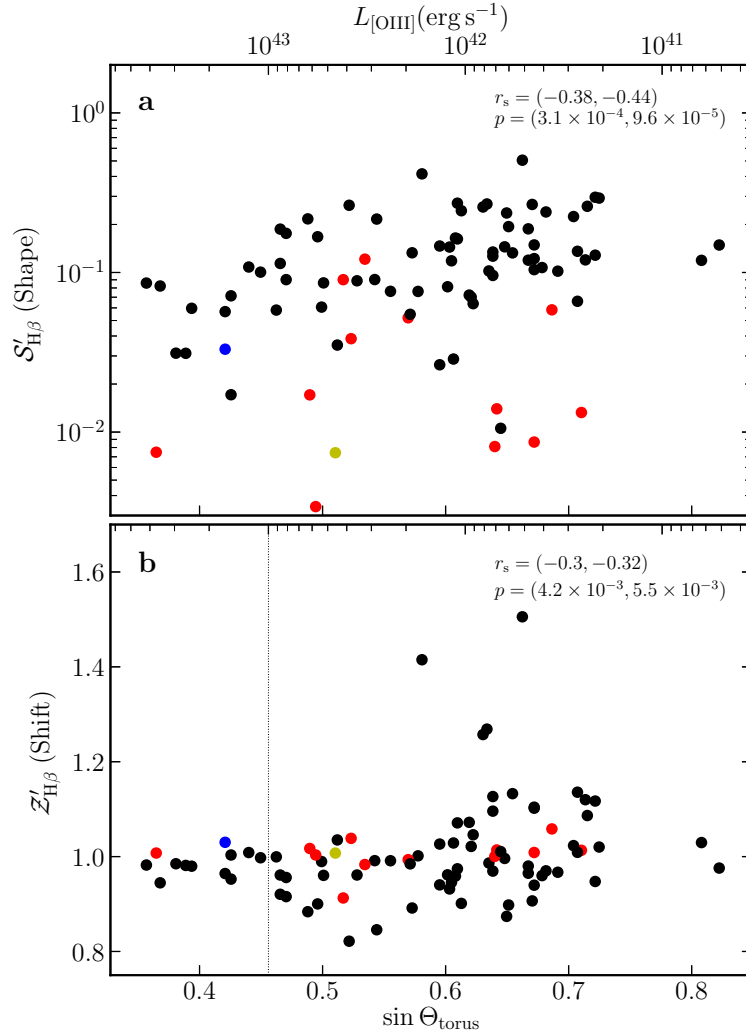

Supplementary Figure 4: **Correlations between  $S'_{H\beta}$  and  $Z'_{H\beta}$  versus  $L_{[OIII]}$ .** Panel a shows a consistent correlation with panel b in Figure 4. There are four outliers with  $Z'_{H\beta} \gtrsim 1.2$  deviating from the correlation in panel b. For objects with  $L_{[OIII]} \gtrsim 10^{43} \text{ erg s}^{-1}$ ,  $Z'_{H\beta} \approx 1$  remains, which have smaller torus angles ( $\Theta_{\text{torus}} \lesssim 30^\circ$ ).

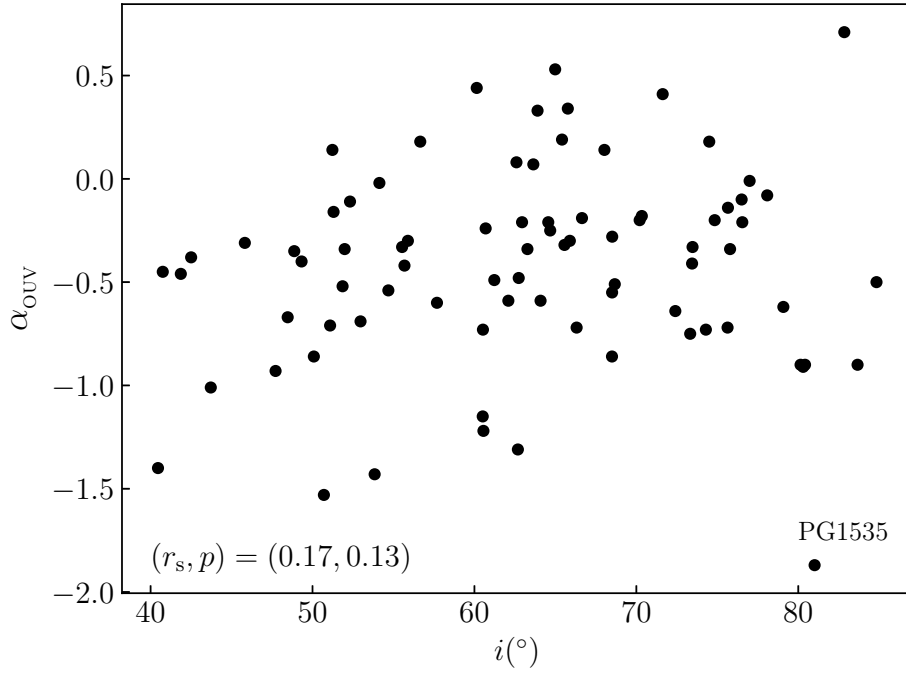

Supplementary Figure 5: **A comparison of PG quasar inclinations from the present model with  $\alpha_{\text{OUV}}$  as an orientation<sup>2</sup>.** This shows that they are consistent with each others. The Spearman coefficient and null-probability are indicated in the plot except for PG 1535. Error bars of  $\alpha_{\text{OUV}}$  are not given by Ref.<sup>2</sup>, and  $i$  is given in Supplementary Table 1.

1. Reyes, R. *et al.* Space density of optically selected type 2 quasars. *Astron. J.* **136**, 2373-2390 (2008).
2. Baskin, A. & Laor, A. What controls the C IV line profile in active galactic nuclei? *Mon. Not. R. Astron. Soc.* **356**, 1029–1044 (2005).
